# Supplementary material for: circNrxn2 Promoted WAT Browning via Sponging miR-103 to Relieve Its Inhibition of FGF10 in HFD Mice
Source: PubMed Central journal article supplement — Mol Ther Nucleic Acids. 2019 Jul 4;17:551–62. doi: 10.1016/j.omtn.2019.06.019 (PMC6661467; doi:10.1016/j.omtn.2019.06.019), 2019-07-04
Supplement: mmc1.pdf [file mmc1.pdf]

**OMTN, Volume 17**

**Supplemental Information**

**circNrxn2 Promoted WAT Browning  
via Sponging miR-103 to Relieve  
Its Inhibition of FGF10 in HFD Mice**

**Tiantian Zhang, Zhenzhen Zhang, Tianyu Xia, Chenlong Liu, and Chao Sun**

# Supplemental Material

## Supplemental Figure 1

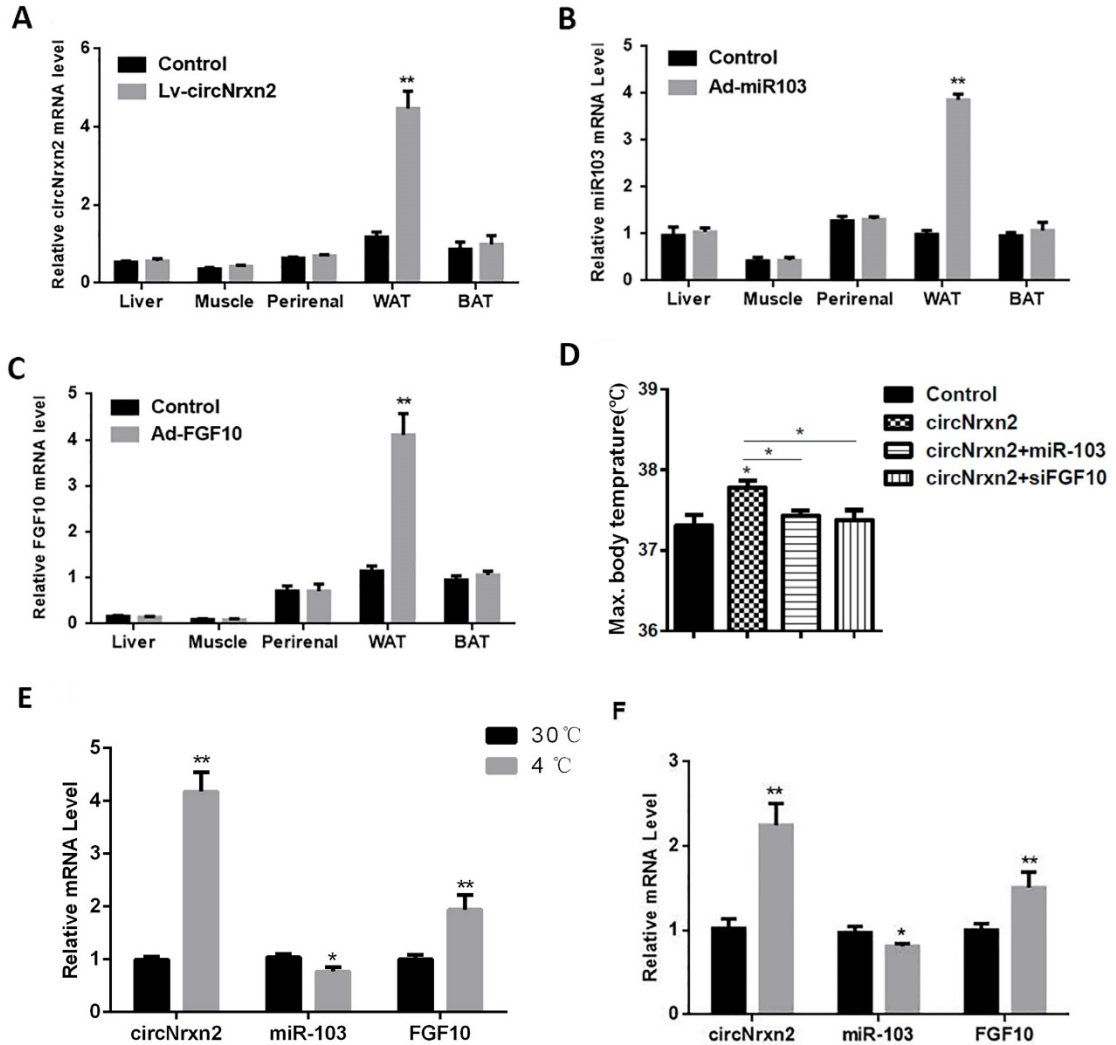

Supplemental Figure 1. (A-C) The mRNA levels of circNrxn2, miR-103, FGF10 in liver, muscle, perirenal, WAT, BAT after ip injection of Lv-circNrxn2. (D) Body temperature of mice after ip injection of circNrxn2, miR-103 and FGF10. (E and F) The relative mRNA levels of circNrxn2, miR-103 and FGF10 after cold stimulation in iWAT and eWAT. (\* $p < 0.05$ ; \*\* $p < 0.01$ .  $n \geq 3$ )

## Supplemental Figure 2

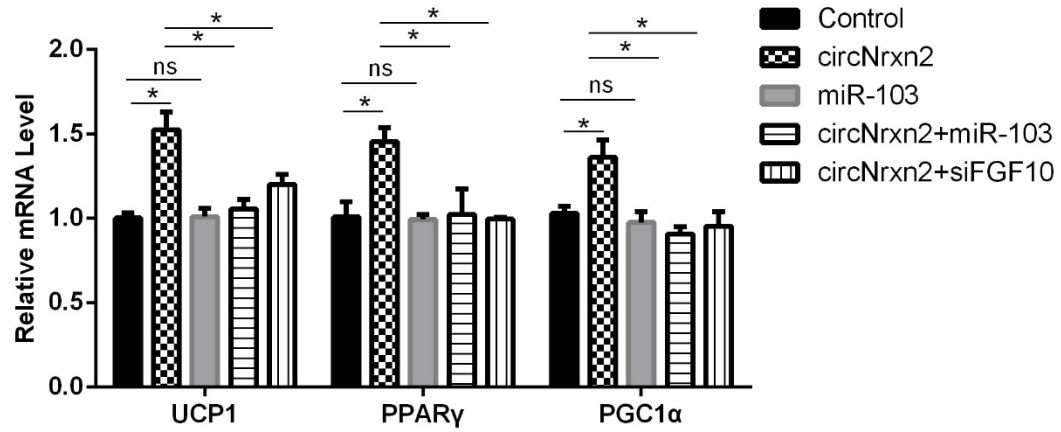

Supplemental Figure 2. miR-103 is not necessary as an additional control circNrxn2 + miR-103. The mRNA level of UCP1, PPAR $\gamma$  and PGC1 $\alpha$  under the treatment of circNrxn2, miR-103, circNrxn2 + miR-103 and circNrxn2 + siFGF10. (\*p < 0.05; \*\*p < 0.01. n $\geq$ 3).
